# Supplementary material for: Effect of Intermittent Hypoxia on Metabolic Syndrome and Insulin Resistance in the General Male Population
Source: MDPI journal article supplement (doi:10.3390/medicina57070668), 2021-06-29
Supplement: s1 [file s1]

**Supplementary Table S1.** Parameters of metabolic syndrome according to ODI groups.

|          | ODI < 5<br>(n=66) | 5 ≤ ODI < 15<br>(n=57) | ODI ≥ 15<br>(n=61) | <i>p</i> -value |
|----------|-------------------|------------------------|--------------------|-----------------|
| WC*      | 85.16 ± 6.90      | 87.93 ± 6.89           | 91.39 ± 6.90       | <0.001          |
| SBP      | 110.78 ± 10.89    | 113.68 ± 10.84         | 115.25 ± 10.92     | 0.068           |
| DBP*     | 72.85 ± 9.06      | 76.54 ± 9.02           | 77.97 ± 9.08       | 0.005           |
| HDL*     | 54.41 ± 11.82     | 50.18 ± 11.77          | 48.35 ± 11.85      | 0.014           |
| TG*      | 115.68 ± 69.79    | 137.15 ± 74.76         | 167.16 ± 72.78     | <0.001          |
| FBG*     | 99.27 ± 12.31     | 96.41 ± 12.26          | 102.95 ± 12.34     | 0.017           |
| HOMA-IR* | 1.43 ± 1.31       | 1.60 ± 1.31            | 2.24 ± 1.33        | <0.001          |

WC, waist circumference; SBP, systolic blood pressure; DBP, diastolic blood pressure; TG, triglyceride; HDL, high-density lipoprotein cholesterol; FBG, plasma fasting blood glucose; ODI, oxygen-desaturation index; HOMA-IR, homeostasis model of assessment for insulin resistance index. \* indicates a *p* value < 0.05.
